# Supplementary material
Source: PubMed Central journal article supplement (PMC2890804)
Supplement: 1000967107_pnas.1000967107_SI.pdf [file 1000967107_pnas.1000967107_SI.pdf]

# Supporting Information

Gries et al. 10.1073/pnas.1000967107

## SI Text

**SI Materials and Methods. Solutions and materials.** RNA polymerase holoenzyme (RNAP) containing  $\sigma^{70}$  was endogenously expressed and purified from *Escherichia coli* K-12 MG1655. To label the nt strand for footprinting, DNA fragments containing the  $\lambda P_R$  promoter were obtained from pMR288 using XbaI and SmaI cleavage; polynucleotide kinase (PNK) was used to add  $^{32}\text{P}$ . To label the template strand, pBR81 was cut using BssHII and SmaI, and radio-labeled with  $^{32}\text{P}$  using PNK. Fragments were isolated as described in ref. 1. Binding buffer (BB) contained 40 mM tris(hydroxymethyl)-aminomethane (Tris; pH 8.0 at 10 °C), 10 mM  $\text{MgCl}_2$ , 120 mM NaCl, and 100  $\mu\text{g}/\text{mL}$  bovine serum albumin. RNAP storage buffer (SB) contained 10 mM Tris (pH 7.5 at 4 °C) 6.85 M glycerol, 100 mM NaCl, 100 nM  $\text{Na}_2\text{EDTA}$ , and 100 nM DTT. Enzymes were from New England Biolabs, and chemical reagents were from Sigma-Aldrich.

**Population modeling.** Interpolated rate constants from ref. 2 were input into Berkeley Madonna software (R.I. Macey and George F. Oster, University of California–Berkeley, [www.berkeleymadonna.com](http://www.berkeleymadonna.com)) to generate a population histogram for the reaction resulting after addition of a nonperturbing competitor heparin or after a  $[\text{NaCl}]$  upshift of preformed open complexes. The population histogram was integrated with a 150-ms interval for each time point to correct for the lowering of time resolution due to the time required for the  $\text{MnO}_4^-$  reaction. The  $\text{MnO}_4^-$  reactivity for each reactive thymine position in  $\text{I}_2$  relative to that of the RPo control was determined by comparing the observed amplitude and decay of reactivity to simulation-generated curves. To generate simulated  $\text{MnO}_4^-$  reactivity at each time point, the population of RPo remaining was considered to retain 100% reactivity, whereas the remaining population of  $\text{I}_2$  was considered to retain a constant fraction (0–100%) of the reactivity of the RPo control throughout the decay.

Table S1. Simulation parameters utilized in Fig. 1

| 0.120 M salt                                     | 1.1 M salt                            |
|--------------------------------------------------|---------------------------------------|
| $K_1 = 2.7 \times 10^7 \text{ M}^{-1*}$          | $k_{-2} = 0.72 \text{ s}^{-1\dagger}$ |
| $k_2 = 2.1 \times 10^{-3} \text{ s}^{-1\dagger}$ | $k_3 = 0.093 \text{ s}^{-1\ddagger}$  |
| $k_{-2} = 0.72 \text{ s}^{-1\dagger}$            | $k_{-3} = 10 \text{ s}^{-1\ddagger}$  |
| $k_3 = 100 \text{ s}^{-1\dagger}$                |                                       |
| $k_{-3} = 0.033 \text{ s}^{-1\dagger}$           |                                       |

\*Interpolated from the temperature dependence of values for  $K_1$  in ref. 1.

<sup>†</sup>Ref. 2.

<sup>‡</sup>Ref. 1.

<sup>§</sup>The observed, overall salt dependence of  $k_d$  from ref. 2 was dissected into the individual salt dependence of  $k_3$  and  $k_{-3}$  ( $\frac{d \ln k_3}{d \ln |\text{salt}|} \approx -3.15$  and  $\frac{d \ln k_{-3}}{d \ln |\text{salt}|} \approx 2.58$ ). Values of  $k_3$  and  $k_{-3}$  in 1.1 M salt were determined by applying the individual salt dependences to the values of  $k_3$  and  $k_{-3}$  in 0.120 M salt from ref. 2.

1 Craig ML, et al. (1998) DNA footprints of the two kinetically significant intermediates in formation of an RNA polymerase-promoter open complex: evidence that interactions with start site and downstream DNA induce sequential conformational changes in polymerase and DNA. *J Mol Biol* 283:741–756.

2 Kontur WS, Saecker RM, Capp MW, Record MT, Jr. (2008) Late steps in the formation of *E. coli* RNA polymerase- $\lambda P_R$  promoter open complexes: Characterization of conformational changes by rapid [perturbant] upshift experiments. *J Mol Biol* 376:1034–1047.
